# Supplementary material for: Ru-Promoted CO2 activation for oxidative dehydrogenation of propane over chromium oxide catalyst
Source: Royal Society of Chemistry journal article supplement (doi:10.1039/c9cy01990a), 2020-01-01
Supplement: c9cy01990a1.pdf [file c9cy01990a1.pdf]

## Electronic Supplementary Information

### **Ru-Promoted CO<sub>2</sub> activation for Oxidative Dehydrogenation of Propane over Chromium Oxide Catalyst**

Renxi Jin,<sup>a</sup> Justin Easa,<sup>a</sup> Dat T. Tran,<sup>b</sup> and Casey P. O'Brien<sup>a,b,\*</sup>

<sup>a</sup> *Department of Chemical and Biomolecular Engineering, University of Notre Dame, Notre Dame, Indiana 46556, United States*

<sup>b</sup> *Sensors and Electron Devices Directorate, FCDD-RLS-DE, CCDC Army Research Laboratory, 2800 Powder Mill Road, Adelphi, MD 20783*

Table S1 Catalytic performance of catalysts for the dehydrogenation reaction of propane with or without CO<sub>2</sub>, measured after 50 min on stream.

| Sample                                                            | Reaction condition      | Production rate (mmol/ g <sub>catal</sub> / h) |      |                | Conversion(%)                 |                 | Selectivity(%)                | Yield (%)                     |
|-------------------------------------------------------------------|-------------------------|------------------------------------------------|------|----------------|-------------------------------|-----------------|-------------------------------|-------------------------------|
|                                                                   |                         | C <sub>3</sub> H <sub>6</sub>                  | CO   | H <sub>2</sub> | C <sub>3</sub> H <sub>8</sub> | CO <sub>2</sub> | C <sub>3</sub> H <sub>6</sub> | C <sub>3</sub> H <sub>6</sub> |
| Cr <sub>10</sub> O <sub>x</sub> /SiO <sub>2</sub>                 | With CO <sub>2</sub>    | 6.8                                            | 2.7  | 6.5            | 4.9                           | 1.1             | 79                            | 3.9                           |
|                                                                   | Without CO <sub>2</sub> | 6.9                                            | /    | 8.5            | 4.8                           | /               | 82                            | 3.9                           |
| Ru <sub>1</sub> Cr <sub>10</sub> O <sub>x</sub> /SiO <sub>2</sub> | With CO <sub>2</sub>    | 13.6                                           | 11.4 | 9.5            | 9                             | 5.6             | 85                            | 7.7                           |
|                                                                   | Without CO <sub>2</sub> | 6.4                                            | /    | 7.4            | 4.1                           | /               | 88                            | 3.6                           |
| Ru <sub>3</sub> Cr <sub>10</sub> O <sub>x</sub> /SiO <sub>2</sub> | With CO <sub>2</sub>    | 3.1                                            | 35.9 | 13             | 4.5                           | 11.5            | 39                            | 1.8                           |
|                                                                   | Without CO <sub>2</sub> | 5.9                                            | /    | 6.9            | 3.8                           | /               | 86                            | 3.7                           |
| Ru <sub>1</sub> /SiO <sub>2</sub>                                 | With CO <sub>2</sub>    | 0                                              | 43.5 | 14.1           | 4.8                           | 16.2            | 0                             | 0                             |

Table S2 Catalytic activities of reported chromium-based catalysts toward ODP reaction

| Catalysts                                                       | WHSV<br>(CO <sub>2</sub> -C <sub>3</sub> H <sub>8</sub> )<br>(ml / g /h) | T(°C) | CO <sub>2</sub> : C <sub>3</sub> H <sub>8</sub><br>ratio<br>(feedgas) | Measure<br>time | C <sub>3</sub> H <sub>8</sub> : CO <sub>2</sub><br>ratio<br>(consumed) | C <sub>3</sub> H <sub>6</sub><br>(selectivity) | C <sub>3</sub> H <sub>6</sub><br>production<br>rate<br>(mmol/ g <sub>catal</sub><br>/h) | H <sub>2</sub><br>production<br>rate<br>(mmol/ g <sub>catal</sub><br>/h) | Ref       |
|-----------------------------------------------------------------|--------------------------------------------------------------------------|-------|-----------------------------------------------------------------------|-----------------|------------------------------------------------------------------------|------------------------------------------------|-----------------------------------------------------------------------------------------|--------------------------------------------------------------------------|-----------|
| 0.5wt%Ni-<br>10wt%CrO <sub>x</sub> /SBA-<br>15                  | 9000<br>(10%-10%)                                                        | 600   | 1:1                                                                   | 1 h             | 1:0.63                                                                 | 90                                             | 9.44                                                                                    | N/A                                                                      | 1         |
| 1.27wt%<br>CrO <sub>x</sub> /mesoporous<br>silica               | 9000<br>(10%-10%)                                                        | 600   | 1:1                                                                   | 40 min          | N/A                                                                    | 89                                             | 11.25                                                                                   | N/A                                                                      | 2         |
| 0.97wt%Cr <sub>2</sub> O <sub>3</sub> /SiO <sub>2</sub> -<br>Ab | 3600(No dilution)                                                        | 600   | 5:1                                                                   | 0.75 h          | N/A                                                                    | 94.5                                           | 3.96                                                                                    | N/A                                                                      | 3         |
| 5wt%Cr/SiO <sub>2</sub>                                         | 667 h <sup>-1</sup> (volume<br>velocity,30%-15%)                         | 550   | 2:1                                                                   | 20 min          | N/A                                                                    | 90                                             | N/A                                                                                     | N/A                                                                      | 4         |
| 2wt%Cr/SiO <sub>2</sub> -<br>(disordered-porous)                | 200 h <sup>-1</sup> (volume<br>velocity,30%-15%)                         | 600   | 2:1                                                                   | 20 min          | 1:0.27                                                                 | 66                                             | N/A                                                                                     | N/A                                                                      | 5         |
| 6wt%Cr/SiO <sub>2</sub> -<br>Ethenol vapor                      | 6000 (90%-10%)                                                           | 600   | 9:1                                                                   | /               | N/A                                                                    | 83.2                                           | 8.58                                                                                    | N/A                                                                      | 6         |
| 5wt% Cr <sub>2</sub> O <sub>3</sub> -SiO <sub>2</sub>           | 15000<br>(20%-12%)                                                       | 550   | 1.6:1                                                                 | 10 min          | N/A                                                                    | /                                              | 12.85                                                                                   | N/A                                                                      | 7         |
| 7wt%Cr/SBA-1                                                    | 9000<br>(33%-6.6%)                                                       | 550   | 5:1                                                                   | 10 min          | 1:0.45                                                                 | 85                                             | 8.58                                                                                    | N/A                                                                      | 8         |
| Cr/SiO <sub>2</sub> -Ab<br>(Si:Cr=57)                           | 7500(68%-12%)                                                            | 550   | 5.7:1                                                                 | 0.5 h           | N/A                                                                    | 90                                             | 6                                                                                       | 4.5                                                                      | 9         |
| 3.4wt%Cr/SBA                                                    | 9000(33%-6.6%)                                                           | 550   | 5:1                                                                   | 10 min          | 1:0.69                                                                 | 87.9                                           | 7.74                                                                                    | 5.8                                                                      | 10        |
| 1wt%Ru-<br>10wt%Cr/SiO <sub>2</sub>                             | 12000(33%-33%)                                                           | 493   | 1:1                                                                   | 50 min          | 1:0.76                                                                 | 85                                             | 13.6                                                                                    | 9.5                                                                      | This work |

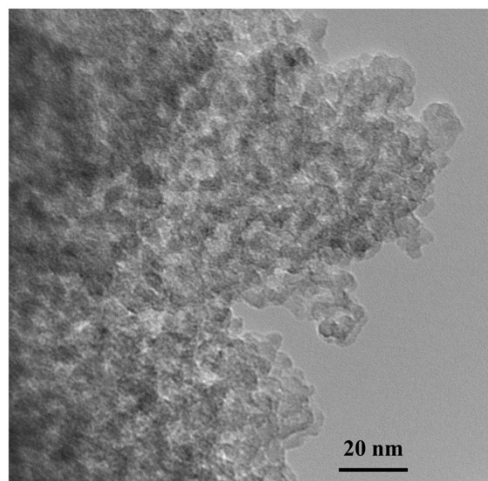

Fig. S1 TEM image of silica gel support

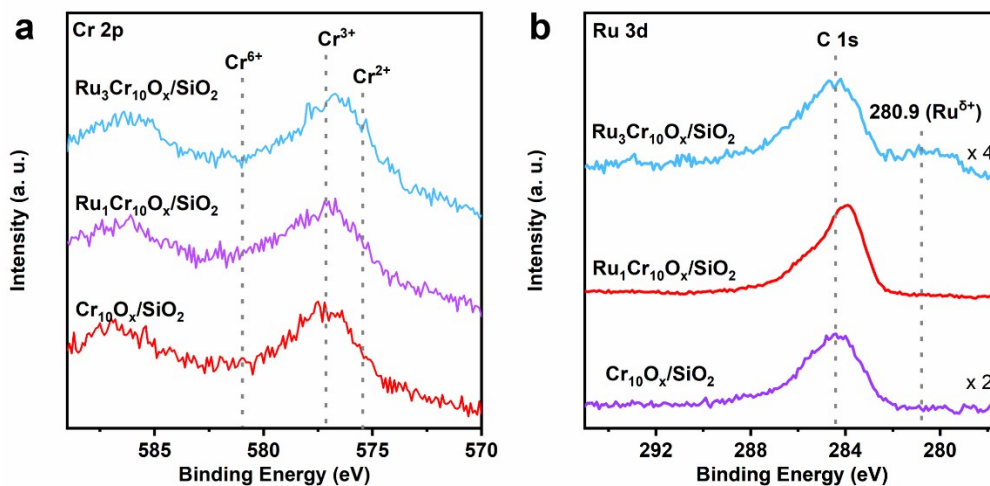

Fig. S2 Cr 2p (a) and Ru 3d (b) XPS spectra of  $\text{Cr}_{10}\text{O}_x/\text{SiO}_2$  (purple),  $\text{Ru}_1\text{Cr}_{10}\text{O}_x/\text{SiO}_2$  (red), and  $\text{Ru}_3\text{Cr}_{10}\text{O}_x/\text{SiO}_2$  (blue) after 50 min of reaction.

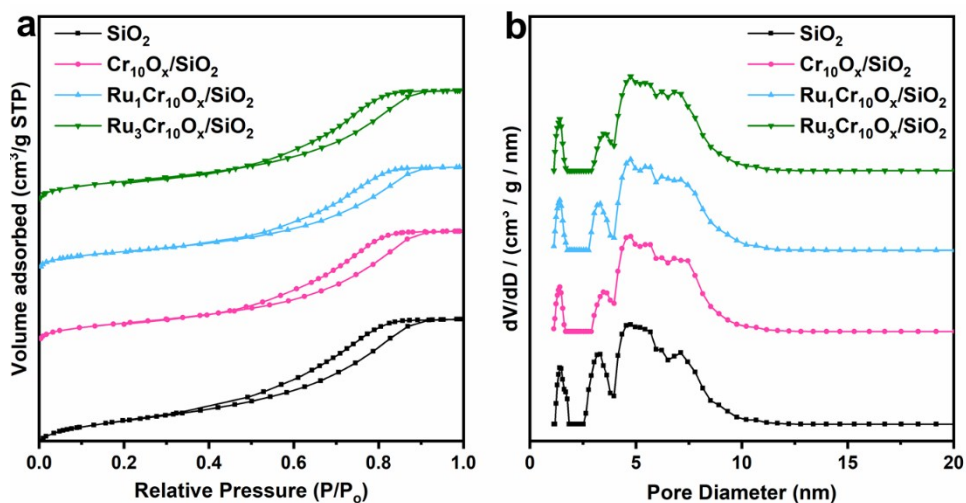

Fig. S3 Nitrogen adsorption-desorption isotherm (a) and the corresponding pore-size distribution curve (b) of the different samples.

Table S3 Textural properties of different samples

| Sample                                                            | BET (m <sup>2</sup> /g) | Pore Volume (cm <sup>3</sup> /g) | Pore size (nm) |
|-------------------------------------------------------------------|-------------------------|----------------------------------|----------------|
| SiO <sub>2</sub>                                                  | 511.3                   | 0.81                             | 2-10           |
| Cr <sub>10</sub> O <sub>x</sub> /SiO <sub>2</sub>                 | 400.2                   | 0.72                             | 2-10           |
| Ru <sub>1</sub> Cr <sub>10</sub> O <sub>x</sub> /SiO <sub>2</sub> | 413.5                   | 0.72                             | 2-10           |
| Ru <sub>3</sub> Cr <sub>10</sub> O <sub>x</sub> /SiO <sub>2</sub> | 410.9                   | 0.72                             | 2-10           |

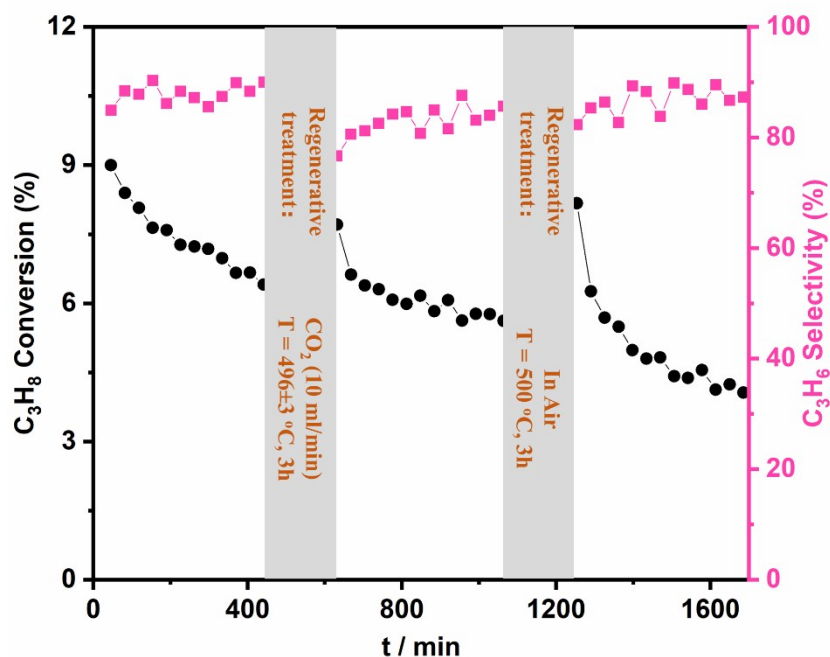

Fig. S4 Regenerative test of Ru<sub>1</sub>Cr<sub>10</sub>O<sub>x</sub>/SiO<sub>2</sub> catalyst.

Reference:

1. D. Yun, J. Baek, Y. Choi, W. Kim, H. J. Lee and J. Yi, *ChemCatChem* 2012, **4**, 1952–1959.
2. J. Baek, H. J. Yun, D. Yun, Y. Choi and J. Yi, *ACS Catal.* 2012, **2**, 1893–1903.
3. P. Michorczyk and J. Ogonowski, *React. Kinet. Catal. Lett.* 2003, **78**, 41–47.
4. M. A. Botavina, G. Martra, Y.A. Agafonov, N. A. Gaidai, N. V. Nekrasov, D. V. Trushin, S. Coluccia and A. L. Lapidus, *Appl. Catal. A Gen.* 2008, **347**, 126–132.
5. M. A. Botavina, Y. A. Agafonov, N. A. Gaidai, E. Groppo, V. Cortés Corberán, A. L. Lapidus and G. Martra, *Catal. Sci. Technol.*, 2016, **6**, 840–850.

6. L. Li, W. Zhu, L. Shi, Y. Liu, H. Liu, Y. Ni, S. Liu, H. Zhou and Z. Liu, *Chin. J. Catal.* 2016, **37**, 359–366.
7. T. Shishido, K. Shimamura, K. Teramura and T. Tanaka, *Catal. Today* 2012, **185**, 151–156.
8. P. Michorczyk, P. Pietrzyk and J. Ogonowski, *Micropor. Mesopor. Mat.*, 2012, **161**, 56–66.
9. K. Takehira, Y. Ohishi, T. Shishido, T. Kawabata, K. Takaki, Q. Zhang and Y. Wang, *J. Catal.* 2004, **224**, 404–416
10. P. Michorczyk, J. Ogonowski and K. Zeńczak, *J. Mole. Catal. A: Chem.* 2011, **349**, 1–12.
